# Supplementary material for: Pseudomonas aeruginosa Interstrain Dynamics and Selection of Hyperbiofilm Mutants during a Chronic Infection
Source: PubMed Central journal article supplement (PMC6692513; doi:10.1128/mbio.01698-19), 2019-08-13

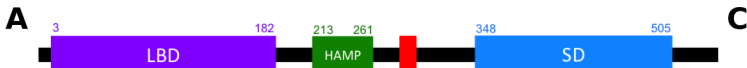

**B**

|     |                                                                                                                                                                 |     |
|-----|-----------------------------------------------------------------------------------------------------------------------------------------------------------------|-----|
| 251 | <b>TGFNGMAEELKGLV</b> SQAQRSSVQVTTSVTEIAAT <b>SKQQQATATETAAT</b> TT                                                                                             | 300 |
| reg | a <b>bc</b> defgabc <b>de</b> fgabc <b>de</b> fgabc <b>de</b> fgabc <b>de</b> fgabc <b>de</b> fgab                                                              |     |
| h#  | N22      N21      N20      N19 <b>N16</b> N15                                                                                                                   |     |
|     |                                                                                                                                                                 |     |
| 301 | EIGATSREIAATSRDLVRTMSEVSGAAEQTSTLAGSGQLGLARMEET <b>MHH</b>                                                                                                      | 350 |
| reg | cdefgabc <b>de</b> fgabc <b>de</b> fgabc <b>de</b> fgabc <b>de</b> fgabc <b>de</b> fgabc <b>de</b> fgabc                                                        |     |
| h#  | N14      N13      N12      N11      N10      N09      N08                                                                                                       |     |
|     |                                                                                                                                                                 |     |
| 351 | <b>VMGAADLVNAKLAILNEKAGNINQVVTTIVKVADQTNLLSLNAAIEAEKA</b>                                                                                                       | 400 |
| reg | defgabc <b>de</b> fgabc <b>de</b> fgabc <b>de</b> fgabc <b>de</b> fgabc <b>de</b> fgabc <b>de</b> fgabc <b>de</b> fgabcd                                        |     |
| h#  | N07      N06      N05      N04      N03      N02      N01                                                                                                       |     |
|     |                                                                                                                                                                 |     |
| 401 | <b>GEYGRGFAVVATEVRRRLADQTAVATYDIEQMVREIQSAVSAGVMGMDKFS</b>                                                                                                      | 450 |
| reg | efgabc <b>de</b> fgabc <b>de</b>                                |     |
| h#  | C01      C02      C03      C04      C05      C05      C07                                                                                                       |     |
|     |                                                                                                                                                                 |     |
| 451 | <b>EEVRRGIAEVGQVGEQLSQIIQQVQALAPRVQMVNEGMQAQATGAEQINQ</b>                                                                                                       | 500 |
| reg | fgabc <b>de</b> |     |
| h#  | C08      C09      C10      C11      C12      C13      C14                                                                                                       |     |
|     |                                                                                                                                                                 |     |
| 501 | <b>ALVQLGEATGQTVESLRQASFAIDELNLVANGLRNGVSRFKV</b>                                                                                                               | 542 |
| reg | gabc <b>de</b> fgabc <b>de</b>  |     |
| h#  | C15      C16      C19      C20      C21      C22                                                                                                                |     |

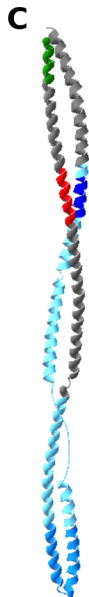

Supplement: mBio.01698-19-sf006.pdf [file mBio.01698-19-sf006.pdf]
