# Supplementary material for: Pseudomonas aeruginosa Interstrain Dynamics and Selection of Hyperbiofilm Mutants during a Chronic Infection
Source: PubMed Central journal article supplement (PMC6692513; doi:10.1128/mbio.01698-19), 2019-08-13
Supplement: mBio.01698-19-s0001.pdf [file mBio.01698-19-s0001.pdf]

1 ***Pseudomonas aeruginosa* inter-strain dynamics and selection of hyper-biofilm**  
2 **mutants during a chronic infection**

3 **Supplemental Information**

4

5 Erin S. Gloag, Christopher W. Marshall, Daniel Snyder, Gina R. Lewin, Jacob S. Harris,  
6 Alfonso Santos-Lopez, Sarah B. Chaney, Marvin Whiteley, Vaughn S. Cooper, Daniel J.  
7 Wozniak

8

9 **Supplementary Materials and Methods**

10 **Bacterial strains and media**

11 *P. aeruginosa* strains were maintained on LANS (Luria agar no salt; 10g/L tryptone, 5g/L  
12 yeast extract solidified with 1.5% agar) unless otherwise specified. RSCV colony  
13 morphology was observed on adjusted Vogel-Bonner minimal media (0.2g/L  
14 MgSO<sub>4</sub>•7H<sub>2</sub>O, 3.5g/L NaNH<sub>4</sub>HPO<sub>4</sub>•4H<sub>2</sub>O, 10g/L K<sub>2</sub>HPO<sub>4</sub>, 0.1g/L CaCl<sub>2</sub>, 2g/L citric acid,  
15 1g/L casamino acid, 40µg/mL Congo red, 15µg/mL brilliant blue, solidified with 1% agar;  
16 VBMM).

17

18 For *E. coli* strains, 10µg/mL gentamicin, 100µg/mL ampicillin or 15µg/mL tetracycline was  
19 used for selection where appropriate. For *P. aeruginosa* strains, 100µg/mL gentamicin,  
20 300µg/mL carbenicillin or 100µg/mL tetracycline was used for selection where  
21 appropriate.

22

23 **Colony morphology**

24 1µL of overnight culture was spotted on VBMM plates and incubated at 37°C for 24h.  
25 Colonies were imaged on a Stereo Microscope (AmScope) fitted with a Microscope Digital  
26 Color CMOS camera (AmScope). Images were processed in FIJI (1).

27

28 **Introducing the barcode that the *Tn7* site**

29 Prior to infection, each strain had been tagged with a unique barcode at the *Tn7* site on  
30 the genome using a genetic barcoding strategy. First, a synthetic insert with the sequence  
31 5'-

32 G TTCAGAGTTCTACAGTCCGACGATCANNNNNNNNNTGCGCCGTAGTCCCAATGA  
33 AAAACCTATGGACTTTGTTTTGGGTAGCATCAGGAATCTGAACCCTGTGAATGTGG  
34 GGGTCGCGCGCATAGACCTTTATCTCCGGTTCAAGTTAGGCATGAGGCTGCATGCT  
35 ACGTTGTCACACCTACACTGCTCGAAGTAAATATGGGAAGCGCGCGGCCTGGCCC  
36 GAGGCGTTCCGCGCCGCCACGTGTTTCGTTAACTGTTGATTGGTGGCACATAAGCAA  
37 TACCGTAGTCGGCTAGGTCAAATAGAGTGCTTTGATATCAGCATGTCTAGCTTAGAT

38 CGGAAGAGCAC -3' was constructed using polymerase cycling assembly (PCA) (2). This  
39 amplicon consists of the Illumina Read 1 Primer site (underlined), ten random nucleotides  
40 (N) which form the barcode, 295 bp of arbitrary sequence, and the Illumina Read 2 Primer  
41 site (underlined). To construct this fragment, the oligonucleotides listed in Table S3 were  
42 added to a 20 µL reaction containing 0.2 µL Phusion Hot Start II DNA Polymerase (NEB),  
43 4 µL 5x Phusion HF buffer, and 0.4 µL dNTP mix (10 mM each). The reaction was  
44 incubated according to the following protocol: 98 °C, 30"; 22 cycles of (98 °C, 10"; 58 °C,  
45 30"; 72 °C, 15"); 72 °C, 5'. The 347 bp band gel purified to create the insert library.

46

47 To prepare the plasmid vector, pUC18-mini-Tn7T-Gm (3) was linearized by a *Bam*HI  
48 digestion. Gel-purified product was used as a template in a 20 µL PCR reaction containing  
49 0.2 µL Phusion Hot Start II DNA Polymerase (NEB), 4 µL 5x Phusion HF buffer, 0.4 µL  
50 dNTP mix (10 mM), and 1 µL of primers KCGbTn7TTSv3F2 and KCGbTn7TTSv3R1  
51 (Table S3) at 10 µM. This PCR was incubated according to the following protocol: 98 °C,

52 30 sec; 30 cycles of (98 °C, 10 sec; 58 °C, 30 sec; 72 °C, 1 min 30 sec); 72 °C, 5 min. The  
53 4.3 kb product was gel purified to create the PCR-amplified vector.

54

55 The insert library and the vector were combined by Gibson assembly (4). The reaction  
56 was electroporated into *E. coli* strain DH5 $\alpha$  and grown overnight on LA (Luria agar; 10g/L  
57 tryptone, 5g/L yeast extract solidified with 1.5% agar) supplemented with 10 ug/mL of  
58 gentamicin to yield ~80,000 colonies. A > 200  $\mu$ g of a high-complexity plasmid library was  
59 prepared from the combined colonies. To tag the *P. aeruginosa* strains, 1 ug each of the  
60 plasmid library and the transposase-containing plasmid pTNS2 was electroporated into  
61 the *P. aeruginosa* strain of interest (3). Electroporants were selected for by growth on LA  
62 supplemented with 100 ug/mL of gentamicin.

63

#### 64 **PCR for identifying the strain frequencies from the wound.**

65 To identify the strain frequencies in the porcine wounds, total DNA was extracted from the  
66 tissue as follows. Tissue was added to 2mL Goodman's buffer A (100 mM NaCl, 100 mM  
67 Tris-HCl pH 8, 10 mM EDTA pH 8, 3.33% SDS, 0.1% sodium deoxycholate) in a bead  
68 beater tube with 0.1mm glass beads and 2-3mm zirconia beads. The tissue was lysed by  
69 placing tubes in a TissueLyser II (QIAGEN) for 30s at 50Hz. This was repeated 4 times,  
70 placing tubes on ice for 30s in between each lysis round to prevent tubes from overheating.  
71 Lysed tissue was incubated with 50 $\mu$ L proteinase K (20mg/mL) for 3h at 55°C. 2mL of  
72 phenol, chloroform, isomyl alcohol solution (25:24:1, pH 8) was added and samples were  
73 centrifuged for 5min at room temperature. The aqueous phase was removed and mixed  
74 with 1.5mL isopropanol. Sample was incubated for 30min at -20°C before being  
75 centrifuged for 30min at 4°C. The pellet was washed in 1mL 75% EtOH and again

76 centrifuged. EtOH was removed and the DNA pellet air-dried and resuspended in 500µL  
77 sterile water.

78

79 The barcode region at the *Tn7* site was amplified from the extracted DNA by the following  
80 PCR using Expand Long-Template Polymerase (Roche). One 50 µL reaction consisted of  
81 0.75 µL polymerase, 5 µl “Buffer 2”, 1 µl 10 mM dNTP mix, 0.5 µL of primers Tn7\_F and  
82 Tn7\_R (Table S3) at 30 µM, 10 µL DNA (20-250 ng), and 31.5 µL water. Cycling conditions  
83 were 95 °C, 2'; 30 cycles of (95 °C, 45"; 54 °C, 45"; 68 °C, 1'); 68 °C, 5'. PCR products  
84 were confirmed by running 2 µL on a 1% agarose gel with the Gene Ruler 1 kb plus ruler  
85 (Thermo Fisher) and quantified with ImageJ (5). This quantification was used to construct  
86 pools of PCR products with approximately equal amounts of each PCR product. As our  
87 sequencing target size was 425 bp, pools were size selected using a BluePippin with a  
88 window of 375-475 bp.

89

### 90 **Biolog assay**

91 A Biolog assay was used as a surrogate indicator for metabolic activity. Strains were set  
92 up in a 96 well plate and incubated statically overnight at 37°C. Cultures were diluted 1:10  
93 in 100µL LBNS with 1.2% Biolog Dye A in a Biolog 96 well plate. Plates were incubated in  
94 an OmniLog incubator (OmniLog) at 37°C for 24h and readings were taken every 15min.  
95 Data were processed using the Biolog kinetic software (OL\_FM\_12), and AUC calculated  
96 using the Biolog parametric software (OL\_PR\_12). Triplicate measurements were  
97 performed for each isolate, each in duplicate.

98

### 99 **Genome assembly and annotation**

100 In order to conduct homology searches for the CRISPR mutations, a *de novo* assembly of  
101 *P. aeruginosa* strain B23-2 was generated. SPAdes version 3.10.1 (6) was used to

102 assemble the isolate using the command \$spades.py -careful -sc --pe1-1  
103 read1\_paired.fq.gz --pe1-2 read2\_paired.fq.gz --pe1-s read1\_unpaired.fq.gz -t 8 -k  
104 21,33,55,77 -o b23\_spades\_out. The assembly was annotated using Prokka v1.12 (7) with  
105 the command \$prokka --centre X --force --locustag b23\_91 --outdir b23\_spades\_out --  
106 prefix b23\_91 --gffver 3 --cpus 8 contigs.fasta.

107

## 108 **Homology modeling**

109 The PA14 WspA sequence was obtained from the Pseudomonas genome database (8).  
110 The sequence was submitted to SWISS-MODEL using a template search (9). Quality of  
111 the returned homology models was assessed on the Global Model Quality Estimation  
112 (GMQE) score (numbers closer to 1 indicate more accurate model) and the QMEAN score  
113 (numbers closer to 0 indicate that the model is comparable to experimental structures).  
114 The homology model of PA14 WspA against the MCP of *Thermotoga maritima* (PDB 3JA6;  
115 (10)) was determined to be the most accurate. The homology model had a GMQE score  
116 of 0.37 and QMEAN score of -1.68.

117

## 118 **Supplementary Results**

### 119 **Non-RSCV PA14-1 populations in the porcine wounds acquire mutations**

120 We were also interested in determining if the non-RSCV PA14-1 population in the porcine  
121 wounds acquired adaptive mutations. One biopsy from each wound was spread plated on  
122 VBMM supplemented with gent. Five non-RSCV colonies, i.e. those displaying a wildtype  
123 colony phenotype, were randomly selected. Therefore, for each timepoint, 20 non-RSCV  
124 isolates were randomly selected. The barcode colony PCR was used to identify the  
125 ancestor strain of each isolate. Similar to the RSCV sub-population, only PA14-1 and  
126 PAO1-B11 isolates were identified (Fig S2A). The two strains showed opposite frequency  
127 trends. PA14-1 was dominant on 3-d and then began to decline. In contrast, PAO1-B11

128 levels on 3-d were low and increased over time to become dominant on 28d (Fig S2A).  
129 These observations are in keeping with the strain frequency previously identified (Fig 1B).  
130  
131 Whole genome sequencing was performed to identify if these isolates had non-RSCV  
132 adaptive mutations (Table S1). Surprisingly, very few had acquired chromosomal  
133 mutations. Two isolates, 108 and 112 had acquired a SNP in the intergenic region between  
134 *fabI* and *ppiD*. These are two enzymes involved in fatty acid synthesis. The observation  
135 that the SNP occurs in the intergenic region suggests that these two enzymes may have  
136 altered expression levels in these isolates (Table S1). Furthermore RSCV-13 and RSCV-  
137 4 had the same secondary mutation (Table 3). Finally, isolate 129 had a SNP in  
138 PA14\_29390 which is annotated as a type VI secretion system protein belonging to the  
139 VgrG superfamily. However, this SNP was synonymous and unlikely to affect the protein  
140 function (Table S1).

141

142 To assess the biofilm formation of these isolates, 24h biofilms were grown in 96 well plates  
143 and biomass levels were quantitated by staining with crystal violet. As expected, the PA14-  
144 1 non-RSCV isolates had biofilm levels equivalent to the ancestor PA14-1 (Fig S2B).  
145 When assessing the metabolic activity of the isolates compared to the ancestor strain,  
146 there initially appeared to be a defect based on the area under the curve (AUC)  
147 measurements (Fig S2C). However, the kinetic curves of representative isolates were  
148 similar to PA14-1, with the exception of isolate 135, which had a reduced exponential  
149 phase (Fig S2D-F). It is currently unclear why the growth of this isolate is affected.

150

#### 151 **Analysis of the CRISPR insertion in PA14-1 RSCV-12 and RSCV-38 isolates**

152 The RSCV-12 CRISPR spacer was identical to the protospacer (corresponding sequence  
153 in the infective mobile genetic element (11)) identified in contig-107 from the B23-2

154 assembly (Fig S4A). RSCV-38 CRISPR spacer had one mismatch between it and the  
155 protospacer in contig-95 (Fig S4B). Following both protospacers were GG dinucleotides  
156 (Fig S4; underlined text), which is the protospacer adjacent motif (PAM) for type I-F  
157 CRISPR-Cas systems that PA14 possesses (12, 13). PAMs are the site on the infective  
158 genetic element targeted by the endonuclease of the CRISPR-Cas system (11). A BLAST  
159 search of the contig sequences suggests that they align to two different prophages in B23-  
160 2. Contig-107 aligns 99% to JBD24 phage, with 1 mismatch, while contig-95 aligns 99%  
161 to LPB1 phage, with 3 mismatches. The BLAST search also identified two additional  
162 protospacers in contig-107 that aligned to CRISPR spacers in *P. aeruginosa* strains.  
163 However, only one possessed the conserved GG PAM (Table S2, Fig S4A; red and blue  
164 text). This suggests that the phage that infected RSCV-12 is a prevalent *P. aeruginosa*  
165 phage, capable of infecting a wide range of *P. aeruginosa* host strains.

166

#### 167 **WspA $\Delta$ 285-298 mutation leads to auto-induction of the Wsp pathway**

168 As the *wspA*  $\Delta$ 285-298 was the most common driver mutation, we investigated how it may  
169 lead to elevated c-di-GMP production. We observed that flanking the junctions of this  
170 deletion was a direct repeat at 837-854bp and 921-938bp (Fig S5A; bold text (14)).

171

172 The WspA  $\Delta$ 285-298 mutation occurs between the predicted HAMP domain (histidine  
173 kinases, adenylate cyclases, methyl accepting proteins, and phosphatases) and the  
174 signaling domain (SD; Fig S6A). MCP cytoplasmic domains are comprised of consecutive  
175 7aa heptads (15). MCPs are defined into classes based on the number of heptads in the  
176 cytoplasmic domain (15), with *P. aeruginosa* WspA belonging to the 40H (40 heptads)  
177 MCP class (16). The 285-298aa (14aa) deletion results in complete deletion of heptads  
178 N19 and N16 (Fig S6B).

179

180 To observe the localization of the deletion in the protein structure and gain insight into how  
181 the  $\Delta 285-298$  mutation may alter the function and signaling of WspA, we generated a  
182 homology model of PA14 WspA against the *Thermotoga maritima* MCP (PDB 3JA6; (10))  
183 (Fig S6C). Based on the model, the region of the deletion is predicted to occur opposite  
184 the methylation site (Fig S6C). We predict that the deletion could de-stabilize or alter the  
185 methylation site resulting in auto-induction of WspA and sustained WspR activation.

186

187

188

189

190

191

192

193

194

195

196

197

198

199

200

201

202

203



204 **References**

- 205 1. **Schindelin J, Arganda-Carreras I, Frise E, Kaynig V, Longair M, Pietzsch T,**  
206 **Preibisch S, Rueden C, Saalfeld S and Schmid B.** 2012. Fiji: an open-source platform  
207 for biological-image analysis. *Nature methods* **9**:676.
- 208 2. **Smith HO, Hutchison CA, Pfannkoch C and Venter JC.** 2003. Generating a  
209 synthetic genome by whole genome assembly:  $\phi$  X174 bacteriophage from synthetic  
210 oligonucleotides. *Proceedings of the National Academy of Sciences* **100**:15440-15445.
- 211 3. **Choi K-H, Gaynor JB, White KG, Lopez C, Bosio CM, Karkhoff-Schweizer RR**  
212 **and Schweizer HP.** 2005. A Tn7-based broad-range bacterial cloning and expression  
213 system. *Nature methods* **2**:443.
- 214 4. **Gibson DG, Young L, Chuang R-Y, Venter JC, Hutchison CA and Smith HO.**  
215 2009. Enzymatic assembly of DNA molecules up to several hundred kilobases. *Nature*  
216 *methods* **6**:343-345.
- 217 5. **Schneider CA, Rasband WS and Eliceiri KW.** 2012. NIH Image to ImageJ: 25  
218 years of image analysis. *Nat Methods* **9**:671-675.
- 219 6. **Nurk S, Bankevich A and Antipov D.** 2013. Assembling genomes and mini-  
220 metagenomes from highly chimeric reads, 158–170. *Research in Computational*  
221 *Molecular Biology, Lecture Notes in Computer Science* **7821**.
- 222 7. **Seemann T.** 2014. Prokka: rapid prokaryotic genome annotation. *Bioinformatics*  
223 **30**:2068-2069.
- 224 8. **Winsor GL, Griffiths EJ, Lo R, Dhillon BK, Shay JA and Brinkman FS.** 2015.  
225 Enhanced annotations and features for comparing thousands of *Pseudomonas* genomes  
226 in the *Pseudomonas* genome database. *Nucleic acids research* **44**:D646-D653.

- 227 9. **Guex N, Peitsch MC and Schwede T.** 2009. Automated comparative protein  
228 structure modeling with SWISS - MODEL and Swiss - PdbViewer: A historical  
229 perspective. *Electrophoresis* **30**.
- 230 10. **Cassidy CK, Himes BA, Alvarez FJ, Ma J, Zhao G, Perilla JR, Schulten K and**  
231 **Zhang P.** 2015. CryoEM and computer simulations reveal a novel kinase conformational  
232 switch in bacterial chemotaxis signaling. *Elife* **4**:e08419.
- 233 11. **Barrangou R and Marraffini LA.** 2014. CRISPR-Cas systems: prokaryotes  
234 upgrade to adaptive immunity. *Molecular cell* **54**:234-244.
- 235 12. **Zegans ME, Wagner JC, Cady KC, Murphy DM, Hammond JH and O'Toole**  
236 **GA.** 2009. Interaction between bacteriophage DMS3 and host CRISPR region inhibits  
237 group behaviors of *Pseudomonas aeruginosa*. *Journal of bacteriology* **191**:210-219.
- 238 13. **Cady K, White A, Hammond J, Abendroth M, Karthikeyan R, Lalitha P, Zegans**  
239 **M and O'Toole G.** 2011. Prevalence, conservation and functional analysis of *Yersinia* and  
240 *Escherichia* CRISPR regions in clinical *Pseudomonas aeruginosa* isolates. *Microbiology*  
241 **157**:430-437.
- 242 14. **Starkey M, Hickman JH, Ma L, Zhang N, De Long S, Hinz A, Palacios S, Manoil**  
243 **C, Kirisits MJ, Starner TD, Wozniak DJ, Harwood CS and Parsek MR.** 2009.  
244 *Pseudomonas aeruginosa* rugose small-colony variants have adaptations that likely  
245 promote persistence in the cystic fibrosis lung. *J Bacteriol* **191**:3492-3503.
- 246 15. **Alexander RP and Zhulin IB.** 2007. Evolutionary genomics reveals conserved  
247 structural determinants of signaling and adaptation in microbial chemoreceptors.  
248 *Proceedings of the National Academy of Sciences* **104**:2885-2890.
- 249 16. **Ortega DR, Fleetwood AD, Krell T, Harwood CS, Jensen GJ and Zhulin IB.**  
250 2017. Assigning chemoreceptors to chemosensory pathways in *Pseudomonas*  
251 *aeruginosa*. *Proceedings of the National Academy of Sciences*:201708842.

- 252 17. **Kim W, Levy SB and Foster KR.** 2016. Rapid radiation in bacteria leads to a  
253 division of labour. *Nature communications* **7**:10508.
- 254 18. **Winsor GL, Khaira B, Van Rossum T, Lo R, Whiteside MD and Brinkman FS.**  
255 2008. The Burkholderia Genome Database: facilitating flexible queries and comparative  
256 analyses. *Bioinformatics* **24**:2803-2804.
- 257 19. **Norman A, Ciofu O, Amador CI, Høiby N and Jelsbak L.** 2016. Genome  
258 sequence of *Pseudomonas aeruginosa* strain DK1-NH57388A, a stable mucoid cystic  
259 fibrosis isolate. *Genome announcements* **4**:e00008-00016.

260

### 261 **Supplementary Figure Legends**

262 **Supplementary Figure 1: Phenotypic profile of *P. aeruginosa* strains used in the**  
263 **infection. (A)** Metabolic activity of the 6 *P. aeruginosa* strains assayed for 16h at 37°C  
264 using a Biolog system. **(B)** Area under the curve (AUC) of the biolog kinetic plot depicted  
265 in **(A)**. \*\* p-value <0.01. **(C)** Biofilms of the 6 *P. aeruginosa* strains were grown for 24h at  
266 37°C in a 96 well plate. Biomass levels were quantified by crystal violet staining. Data  
267 depicted as mean ± SD, n=3. **(D)** Frequency of each strain in the starting inoculum  
268 determined by sequencing the strain specific barcodes at the *Tn7* site. The proportion of  
269 each barcode was expressed as a percentage of the total sequence counts.

270

271 **Supplemental Figure 2: The PA14-1 non-RSCV population in the porcine wounds**  
272 **behave similar to the ancestor strain. (A)** 5 non-RSCV colonies were randomly selected  
273 from each wound. The ancestor of each colony was identified and expressed as a  
274 percentage of the total number of colonies isolated from that timepoint. **(B)** 24h biofilms  
275 were grown in 96 well plates and biomass levels quantified by crystal violet staining.  
276 Biomass levels are expressed as a percentage of PA14-1 which was set to 100%. ns  
277 indicates no significant difference. **(C)** AUC of Biolog kinetic curves. AUC are expressed

278 as a percentage relative to PA14-1 which was set to 100%. Gray scale in **(B)** and **(C)**  
279 indicate different wounds. **(D-F)** Kinetic Biolog curves of representative non-RSCV PA14-  
280 1 isolates from each timepoint (labeled). Data presented as mean  $\pm$  SD, n=3. \* p-value  
281 <0.05, \*\* p-value <0.01, \*\*\* p-value <0.001

282

283 **Supplementary Figure 3: PA14-1 RSCVs from the porcine wounds have an extended**  
284 **lag phase compared to the ancestor strain. (A)** AUC of Biolog metabolic kinetic curves  
285 of all sequenced PA14-1 RSCVs, expressed as a percentage relative to PA14-1.  
286 PA14 $\Delta$ wspF and its parent PA14 were used for comparison. \* p-value <0.01, # p-value  
287 <0.001 compared to the ancestor strain. **(B-E)** Kinetic Biolog curves of representative  
288 PA14-1 RSCVs (labeled). Data presented as mean  $\pm$  SD, n=3.

289

290 **Supplemental Figure 4: Contig sequence from B23-2 with the protospacer**  
291 **sequence.** There is currently no annotated sequence for B23. Therefore the CRISPR  
292 spacer sequences were aligned against the contig sequences of the ancestor B23-2 which  
293 was sequenced along with the representative RSCVs. Protospacer for the CRISPR spacer  
294 in **(A)** RSCV-12 (contig-107) and **(B)** RSCV-38 (contig-95) were identified in two separate  
295 contigs (bold text). For the protospacer sequence in **(B)** contig-95 there was one base pair  
296 mismatch when comparing the CRISPR spacer to the protospacer (base pair that is not  
297 bold). After each protospacer there is a conserved GG PAM motif (underlined) which is  
298 required for type 1-F CRISPR-Cas families which *P. aeruginosa* PA14 possesses. A  
299 BLAST search of the contig sequences identified CRISPR spacers in *P. aeruginosa* strains  
300 (Table S2) aligned to other protospacers in **(A)** contig-107, indicated by the red and blue  
301 text.

302

303 **Supplementary Figure 5: WspA deletions. (A)** 42bp deletion in *wspA* is located between  
304 a direct repeat. Gene sequence of PA14 *wspA*. Underlined is the 42bp deletion (853-  
305 894bp) in the *wspA* mutants. Either side of this sequence is a direct repeat indicated in  
306 bold text. **(B)** Alignment of WspA deletions. Deletions in homologous regions of *wspA* have  
307 been observed in *in vitro* evolved RSCVs; a 286-307aa deletion in *P. aeruginosa* PAO1  
308 (MJK8) (14), a 284 – 311aa deletion in *P. fluorescence* Pfl01 (17) and a 307-313aa  
309 deletion in *Burkholderia cenocepacia* HI2424. The different domains of WspA were  
310 determined from Pfam analysis from the Pseudomonas Genome Database (8) and the  
311 Burkholderia Genome Database (18). Domains are colored as follows: purple = ligand  
312 binding domain or the four helix bundle domain, green = HAMP or linker domain and blue  
313 = MCP signaling domain. The region of the deletion in each protein is indicated in red.

314

315 **Supplementary Figure 6: 14aa deletion in WspA is predicted to occur opposite the**  
316 **methylation site. (A)** Schematic of WspA. The different domains of WspA were  
317 determined from the Pseudomonas Genome Database Pfam analysis. LBD = ligand  
318 binding domain or the four helix bundle domain (3-182aa). HAMP = linker domain (213-  
319 261aa). SD = MCP signaling domain (348-505aa). The region of the 14aa deletion is  
320 indicated in red (285-298aa). **(B)** The WspA cytoplasmic domain amino acid sequence.  
321 The domains are indicated by the same colors in **(A)**. The signaling domain contains two  
322 additional features, the kinase interacting subdomain, or ‘tip’ domain in dark blue (382-  
323 420aa) and the predicated methylation site in navy blue (492-501aa) (16). Both the heptad  
324 registers (reg) and the heptad number (h#) are labeled (15, 16), with consecutive hetpads  
325 indicated in alternating black and grey text. **(C)** Homology model of PA14 WspA modeled  
326 against the *T. maritime* MCP (PDB 3JA6; (10)) generated using SWISS-MODEL. Colors  
327 correspond to the domains indicated in **(B)**. Model spans 250-541aa of WspA.

328
