# Supplementary material for: Pseudomonas aeruginosa Interstrain Dynamics and Selection of Hyperbiofilm Mutants during a Chronic Infection
Source: PubMed Central journal article supplement (PMC6692513; doi:10.1128/mbio.01698-19), 2019-08-13

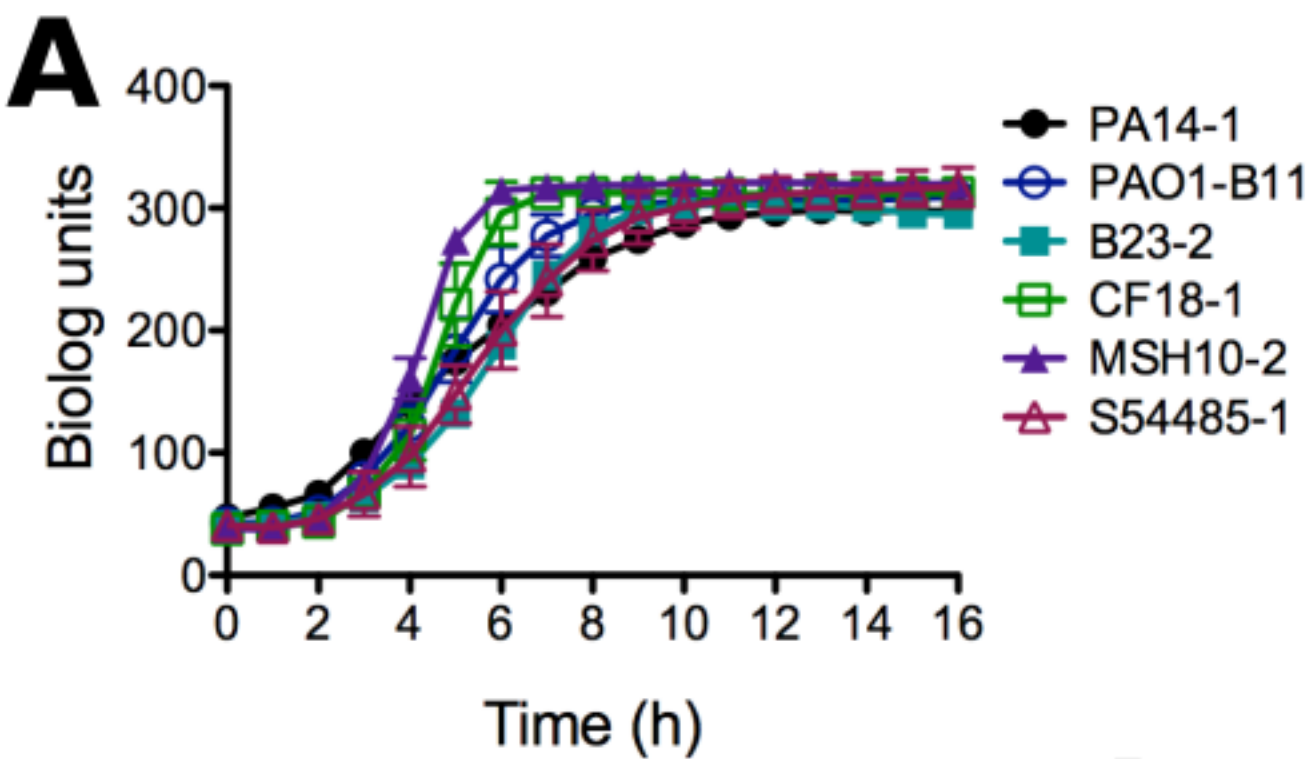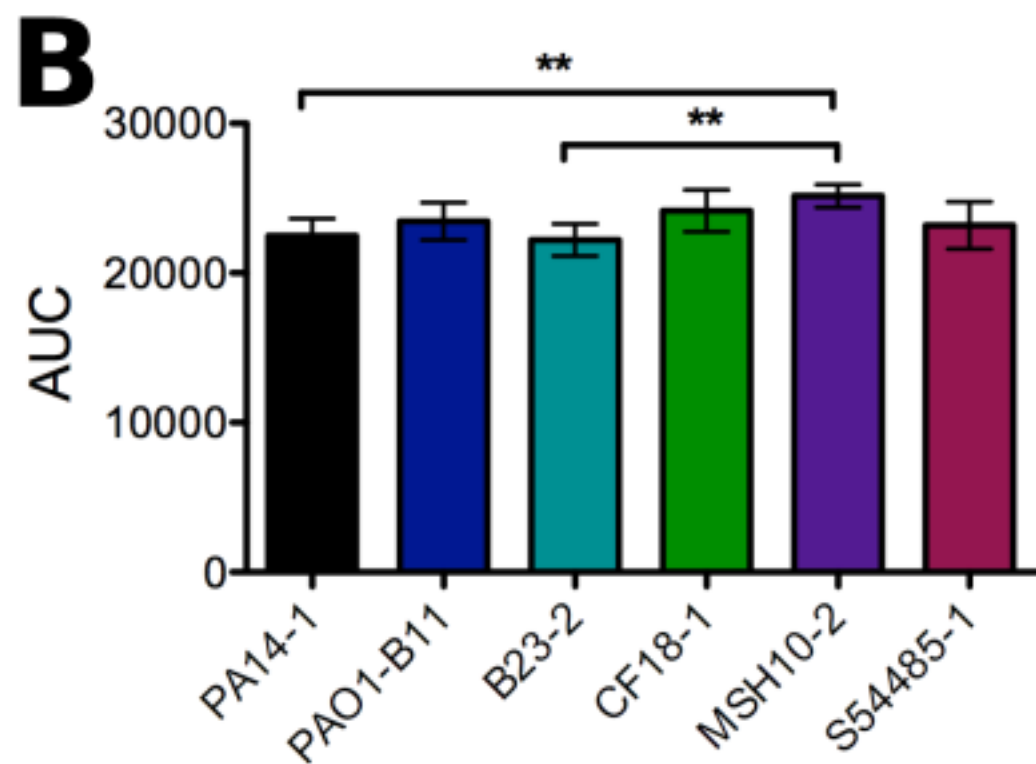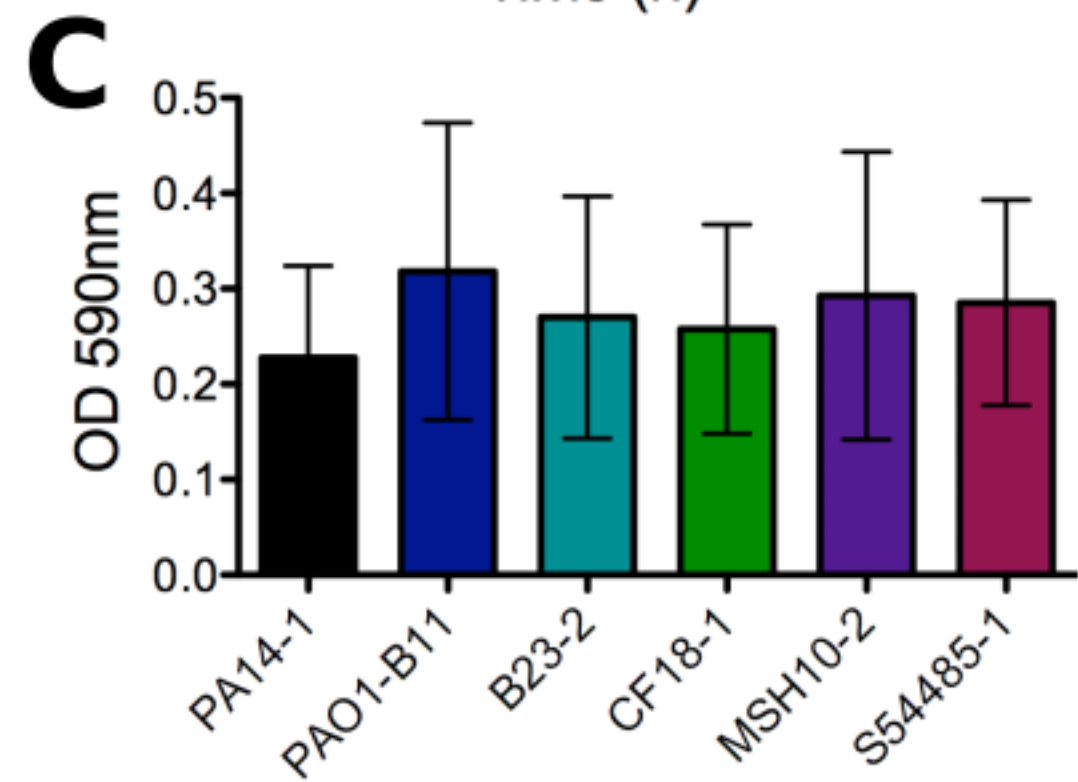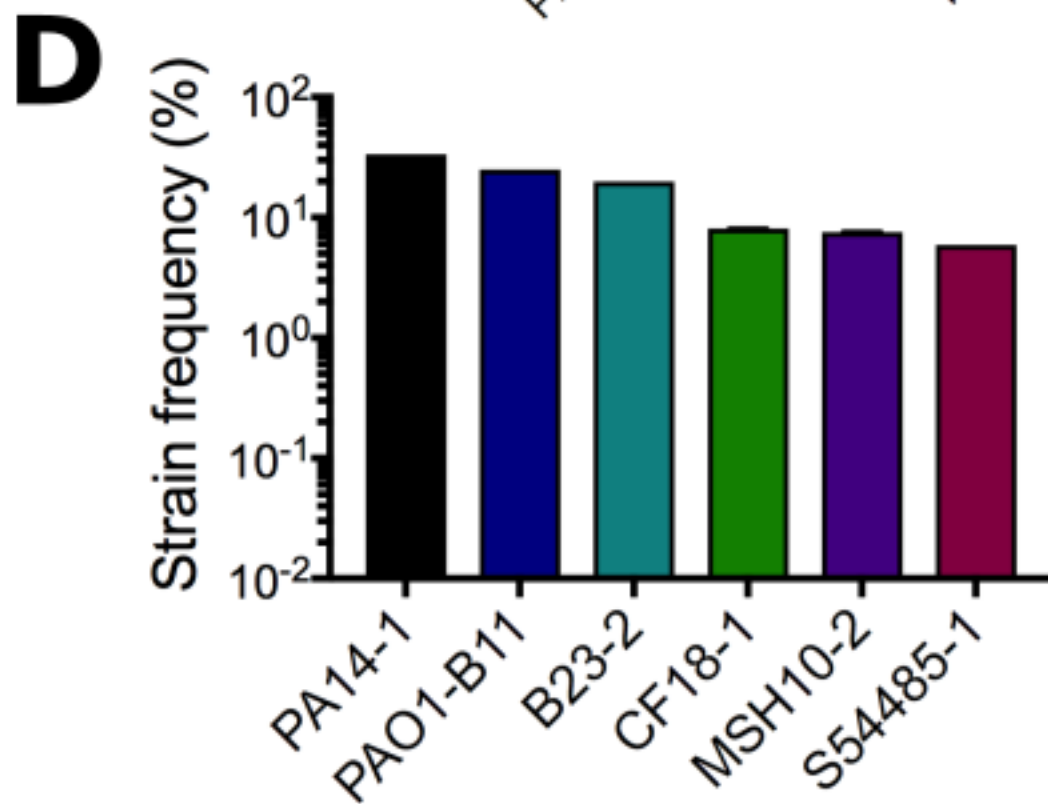

Supplement: mBio.01698-19-sf001.pdf [file mBio.01698-19-sf001.pdf]
