# Supplementary material for: Pseudomonas aeruginosa Interstrain Dynamics and Selection of Hyperbiofilm Mutants during a Chronic Infection
Source: PubMed Central journal article supplement (PMC6692513; doi:10.1128/mbio.01698-19), 2019-08-13
Supplement: mBio.01698-19-sf004.pdf [file mBio.01698-19-sf004.pdf]

## RSCV-12

A

&gt;91\_NODE\_107\_length\_1124\_cov\_80.5597

TCAGTACCGGACCACCACGTCCGGCAGACCGTCCCGGCCAGGCCGGGGCGGTTTCGCTCA  
GTGGACGGTGC GGTTCTGGGCCCTTGGTGTAGTGGATTTCCCTGCTGCGGTTCCCTCGCCGCG  
AGCGCGCCGTGCCAGGCACTCGTTCGACGGCGCAGGAAACGGCGTTACCAACTCCGTTCTG  
CTTTGCGAGTTCTCGGCCGAGGGACATGGTTCGATTGCATAAGGGCGTAGGGCATCTTCGA  
TGCTTCCGAGTTCGTGCAGCGGGCCCTTGCATGGAGAAATCTATTCCGCCTTCGGTGTG  
GCTTAGGGTGTGGTGTATACGGCCATGGCTATGCCCTCTTCTGTGCGGATGCCTGCTTT  
TCCAGCTGGCGGATGCGGGTGC GAATTTCTGCTCGACGATCTTCTGGAGGCCGGTGACC  
GCGAGCGCGCGCGGCATTGTCTCCAGGTGGAAGCCGGCAACGGCGCGGAGTCGGCTATCG  
ACGTTACGGCCCGTAGCTCTGTCCGGGTGATTGAAGGGTTGGACTGCTGCATTCA  
CACCCCAAGCGCACGGAAGCCGGCCGATCTGCTGGCCAGGGTCTGGATGTACCGGC  
GATGGAGCCCAGGTTTTTCGCGGTGCGTGGCGTCCGGGCTCACACCCGGCACGCGCCGGC  
GACTTTCTTGCCGACCTGGTGC GGCTCAGCGGTTGCAAAGACC GCCCGCCGACGCTGGC  
CAAGTCGCCACGGCAAGGGCGAAGTAGCCCTCGCCTGGGTGTTCCCTCCCGAGCTCGAT  
CAGGCCGTCGATGCGGCACATGGCGAACGTTGGTTCATGATCAGAGCCCTCCAGCAGC  
CGAATGGCATCGTGC GTGACCTGGGCCGGAGACTTCCGGCGAGCGCGTGGTGTAGCTGG  
GCCGGCTCGGCCGCGGCATGACCAATTGACTGGGGCGTACTATCGTCAACTCGACTTCC  
GGCACTTCGCCGACGGTGTACTTGAACCCAGCTCCAGAGGCGTAGTCGGCCTGAACCTCT  
GCGGCTCGACTCATGATGTCTATCAGCTTGAGTGCATCAGCCTGGGGTAACAGGAAGCG  
TGATAGTCC AAGGTGACGATGCACAGCTGTTGCGCGCGGTTGCG

## RSCV-38

B

&gt;91\_NODE\_95\_length\_1389\_cov\_37.628

CAGCGCTCGCAACGGAAGCACAAATGCCTGATCCCGCATCCACCTCGGCCGGCAGCGCC  
GCGCTGCTGAAAATGTTTGGCATCCATATCAGCGCGGGCGCCCTGGCCGCCGCCCTGGGC  
TTCCTGGTCTGTGGCCAGGACCATGAAAGAGGGGTTTGCCCGGCTGTTCTGCACCATC  
GTCGCGTCCAGCGTCTTCGGCCGATCCTGGTTCGTTACCTGCAC TCCAACCGCCCGAG  
CTGTTTCGAGTCCGCCAGGTGGTGGCCGGGCTCTACCAGTTAGAGCCGGCAGTCGGCCTG  
CTGTTCCGTTTCCGCTCCGCTCCTGGTATTGCCGGTCTGCCCGCTGGTGGCTGATCGGG  
GCGGCCCTGCGCCTGTTTGTAGCGGGACGGCGATTTCATGGCTGGGCGGTTTCGCCAGTGG  
GTA AACGCAAAC TGGAGAACACCTGATGGCCCTTCAACCTCGCGGCATCCGCAACAACA  
ACCCCGGCAACATCGTCTGGTGGCAGCAACAAC TGGCAGGGGCCAACTCCCCACGACC  
CGCAGATCGAGCCGCGCTTCTGTGTTTTGACACGGCGCAT AACCGCACCCGCGCATTGG  
CCAAGCTGCTGCTGAACTACCGCAAGGTCTATGGCCTGCGCACCGTCAATCGTGTATCG  
CACGCTGGCGCCGCTGCAAGGAGAACAACACCCGCGTATGCCCTGGCCGCGTGGCCGAG  
CGATGGGAGTTCCGCCGACGGCAGCCTGCACCTGGACAGGACCACCTGGTTCGCCCTGG  
TGACCGCCATCATTCACCAGGAAAACGGGCAGCAGCCCTACAGCGCCGAGCAGATCGCC  
AGGCCGTGCGGGAGGTGCTGTGATGCAACGCCCCAGCGGAATCAGCCTCAGCGATCTGTT  
CGCGATCTGCCGTGAAGACCCGGCCAACCGATGGCTCTGGATACGCCTCTATCTCCGCGA  
CCTGCTGGCCCGCGTCTGTGGTTCTGGTCTTCATGGCAATCGGTGCCGAGGCCCTCGCCTA  
TGGCTGGGAGGGGCGTTCGCCTACGGCTTCATGCAGACCGTTGCGTCTTACCAGGTCCA  
GCTCAGCGTCGAGAAATCGCCATGACTTGGCGCGTCCGGCTGATTGTCTTTGTGCTCCTG  
GTGATGGTCTGGACGGCCGGCTGGTGGGGCGGTCGCGAGGCTGGTCTGTCCGATGGGCGC  
GCCGCTGCGCCGACGCACAGACCCGAGCCTACCGCGACGTCCTGGAGCAATCGGCGACA  
CAACTGAAGGCGGTCCAGGACACCAGCGCGGCTCTTTTCCAGCGCCTGGCCAGCGGGCC  
GACAGCGACCAACAAC TACTCGGGAGCTTCGCCATGCCCTGGCCGAAACCGCTGCTGAT  
CGCGCTGCC
