# Supplementary material for: Pseudomonas aeruginosa Interstrain Dynamics and Selection of Hyperbiofilm Mutants during a Chronic Infection
Source: PubMed Central journal article supplement (PMC6692513; doi:10.1128/mbio.01698-19), 2019-08-13
Supplement: mBio.01698-19-st001.pdf [file mBio.01698-19-st001.pdf]

**Table S1: Mutations in non-RSCV PA14-1 population**

| Sample |     |              | Mutations                      |                 |
|--------|-----|--------------|--------------------------------|-----------------|
| Day    | #   | Wound#       | Gene                           | Mutation        |
| 3      | 97  | 1            | No mutations                   |                 |
|        | 98  | 1            | No mutations                   |                 |
|        | 99  | 1            | No mutations                   |                 |
|        | 100 | 1            | No mutations                   |                 |
|        | 101 | 1            | No mutations                   |                 |
|        | 102 | 2            | No mutations                   |                 |
|        | 103 | 2            | No mutations                   |                 |
|        | 104 | 2            | No mutations                   |                 |
|        | 105 | 2            | No mutations                   |                 |
|        | 107 | 3            | No mutations                   |                 |
|        | 108 | 3            | <i>fabI/ppiD</i>               | TTC → TCC       |
|        | 109 | 3            | No mutations                   |                 |
|        | 112 | 4            | <i>fabI/ppiD</i>               | TTC → TCC       |
|        | 113 | 4            | No mutations                   |                 |
|        | 114 | 4            | No mutations                   |                 |
|        | 115 | 4            | No mutations                   |                 |
| 116    | 4   | No mutations |                                |                 |
| 14     | 127 | 3            | No mutations                   |                 |
|        | 128 | 3            | No mutations                   |                 |
|        | 129 | 3            | type VI secretion protein ImpA | H517H (CAT→CAC) |
|        | 133 | 4            | No mutations                   |                 |
|        | 135 | 4            | No mutations                   |                 |
| 28     | 147 | 3            | No mutations                   |                 |
|        | 148 | 3            | No mutations                   |                 |
