# Supplementary material for: Pseudomonas aeruginosa Interstrain Dynamics and Selection of Hyperbiofilm Mutants during a Chronic Infection
Source: PubMed Central journal article supplement (PMC6692513; doi:10.1128/mbio.01698-19), 2019-08-13
Supplement: mBio.01698-19-st002.pdf [file mBio.01698-19-st002.pdf]

**Table S2: CRISPR spacers in *P. aeruginosa* strains with a protospacer aligning to contig-107 in B23-2**

| Strain  | CRISPR spacer                     | PAM <sup>a</sup> | Ref/NCBI #      |
|---------|-----------------------------------|------------------|-----------------|
| PA14    | AAGGTGACGATGCACAGCTGTTGCGCGCGGTTG | No               | CP000438.1 (13) |
| SMC4515 | AAGGTGACGATGCACAGCTGTTGCGCGCGGTTG | No               | HQ326226.1 (13) |
| SMC4500 | AAGGTGACGATGCACAGCTGTTGCGCGCGGTTG | No               | HQ326214.1 (13) |
| SMC4499 | AAGGTGACGATGCACAGCTGTTGCGCGCGGTTG | No               | HQ326213.1 (13) |
| SMC4497 | AAGGTGACGATGCACAGCTGTTGCGCGCGGTTG | No               | HQ326212.1 (13) |
| SMC4493 | AAGGTGACGATGCACAGCTGTTGCGCGCGGTTG | No               | HQ326209.1 (13) |
| SMC4486 | AAGGTGACGATGCACAGCTGTTGCGCGCGGTTG | No               | HQ326202.1 (13) |
| SMC4485 | AAGGTGACGATGCACAGCTGTTGCGCGCGGTTG | No               | HQ326201.1 (13) |
| L10     | AAGGTGACGATGCACAGCTGTTGCGCGCGGTTG | No               | CP019338.1      |
| M1608   | AAGGTGACGATGCACAGCTGTTGCGCGCGGTTG | No               | CP008862.2      |
| PA14OR  | AAGGTGACGATGCACAGCTGTTGCGCGCGGTTG | No               | LT608330.1      |
| Nhmuc   | GGCGGTTTCGCTCAGTGGACGGTGCGGTTCT   | Yes              | CP013479.1      |
| SCVJan  | GGCGGTTTCGCTCAGTGGACGGTGCGGTTCT   | Yes              | CP013478.1      |
| SCVFeb  | GGCGGTTTCGCTCAGTGGACGGTGCGGTTCT   | Yes              | CP013477.1      |
| DK1     | GGCGGTTTCGCTCAGTGGACGGTGCGGTTCT   | Yes              | LN870292.1 (19) |

<sup>a</sup> Present/absent after the protospacer in contig-107 (Fig S4A)
