# Supplementary material for: Pseudomonas aeruginosa Interstrain Dynamics and Selection of Hyperbiofilm Mutants during a Chronic Infection
Source: PubMed Central journal article supplement (PMC6692513; doi:10.1128/mbio.01698-19), 2019-08-13
Supplement: mBio.01698-19-st003.pdf [file mBio.01698-19-st003.pdf]

**Table S3: Primers used in the study**

| Primers                                  | Sequence (5' - 3')                                            |
|------------------------------------------|---------------------------------------------------------------|
| Strain identification                    |                                                               |
| Tn7_F                                    | AATGATACGGCGACCACCGAGATCTACACGTTTCAGAGTTCTACAG                |
| Tn7_R <sup>a</sup>                       | CAAGCAGAAGACGGCATAACGAGATxxxxxxGTGACTGGAGTTCAGACGTGTG         |
| KCGbTn7TTSv3F2                           | AGCTTAGATCGGAAGAGCACACGTCTGAACTCCAGTCAACCCCGGGCTGCAGGAATTCCT  |
| KCGbTn7TTSv3R1                           | TGATCGTCGGACTGTAGAACTCTGAACGTGTAGAACTAGTAGTGCTCATGCATGA       |
| Ancestor ID <sup>b</sup>                 |                                                               |
| PA14-1_F                                 | ATCACA <u>AAAAGGACATGC</u>                                    |
| PAO1-B11_F                               | ATCAGT <u>GTCGTGGG</u> TGC                                    |
| B23-2_F                                  | ATCAG <u>CCTATTGTGTGC</u>                                     |
| CF18-1_F                                 | ATCAG <u>TTACGTCAATGC</u>                                     |
| MSH10-2_F                                | ATCA <u>TATCAGATTT</u> TGC                                    |
| S54485-1_F                               | ATCA <u>TTAAACTAGG</u> TGC                                    |
| AI07-08_R                                | GCTTATGTGCCACCAATCAACAG                                       |
| <i>wspA</i> complementation <sup>c</sup> |                                                               |
| wt- <i>wspA</i> _A                       | taa <sup>a</sup> aacgacggccagtgccaagcttGCGCTGATGGTTCGAACTG    |
| wt- <i>wspA</i> _B                       | gtgacctgcaCCGAAGAACGCTGGGCCT                                  |
| wt- <i>wspA</i> _C                       | cgttcttcggtGCAGGTCACCACCTCGG                                  |
| wt- <i>wspA</i> _D                       | cagctatgacctgattacgaattcACTCCGGCGGGAACAGCA                    |
| Generation of nucleotide barcodes        |                                                               |
| KCGbTn7TagF1                             | GTTCTACAGTCCGACGATCANNNNNNNNNNNTGCGCCGTAGTCCCAATGAAAAACCTATGG |
| KCGbTn7TagR1                             | TTCACAGGGTTCAGATTCCTGATGCTACCCAAAACAAAGTCCATAGGTTTTTCATTGGGA  |
| KCGbTn7TagF2                             | AGGAATCTGAACCCTGTGAATGTGGGGTTCGCGCGCATAGACCTTTATCTCCGGTTCAAG  |
| KCGbTn7TagR2                             | AGTGTAGGTGTGACAACGTAGCATGCAGCCTCATGCCTAACTGTAACCGGAGATAAAGGT  |
| KCGbTn7TagF3                             | TACGTTGTACACCTACACTGCTCGAAGTAAATATGGGAAGCGCGCGCCTGGCCCGAGG    |
| KCGbTn7TagR3                             | CACCAATCAACAGTTAACGAACACGTGGCGGCGCGGAACGCCTCGGGCCAGGCCGCGCGC  |
| KCGbTn7TagF4                             | TCGTAACTGTTGATTGGTGGCACATAAGCAATACCGTAGTCGGCTAGGTCAAATAGAGT   |
| KCGbTn7TagR4                             | GTGCTCTCCGATCTAAGCTAGACATGCTGATATCAAAGCACTCTATTTGACCTAGCCGA   |

<sup>a</sup> xxxxxx indicates the strain-specific barcode sequence (Table 1).

<sup>b</sup> underlined indicates the strain specific barcode sequence (Table 1).

<sup>c</sup> Lower case is specific to pEX18Ap. Upper case is specific to *wspA*
